# Supplementary material for: How do living conditions affect the gut microbiota of endangered Père David’s deer (Elaphurus davidianus)? Initial findings from the warm temperate zone
Source: PeerJ journal article supplement (doi:10.7717/peerj.14897), 2023-02-24

(A)

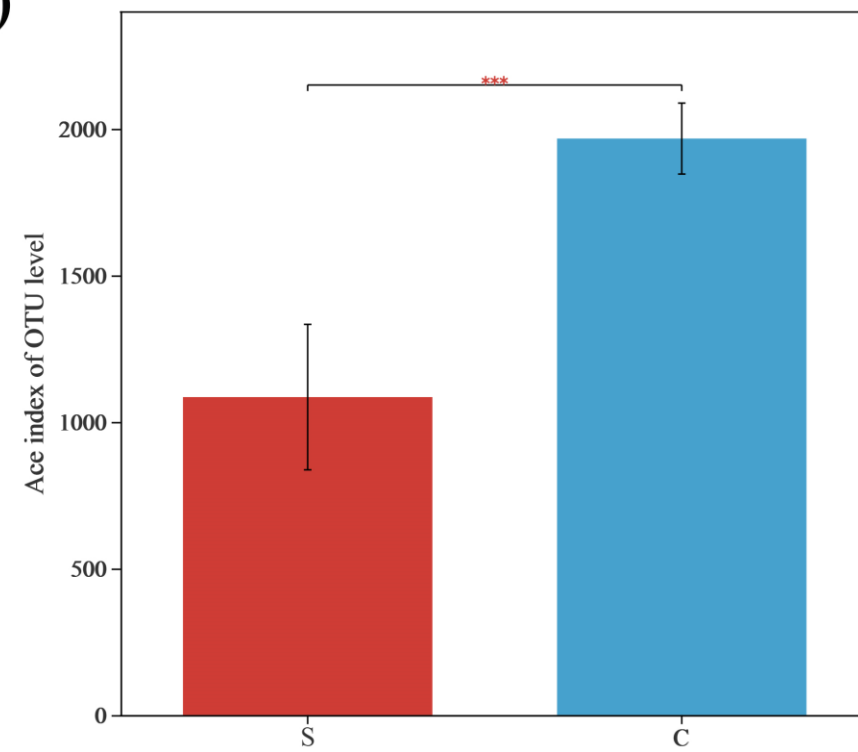

(B)

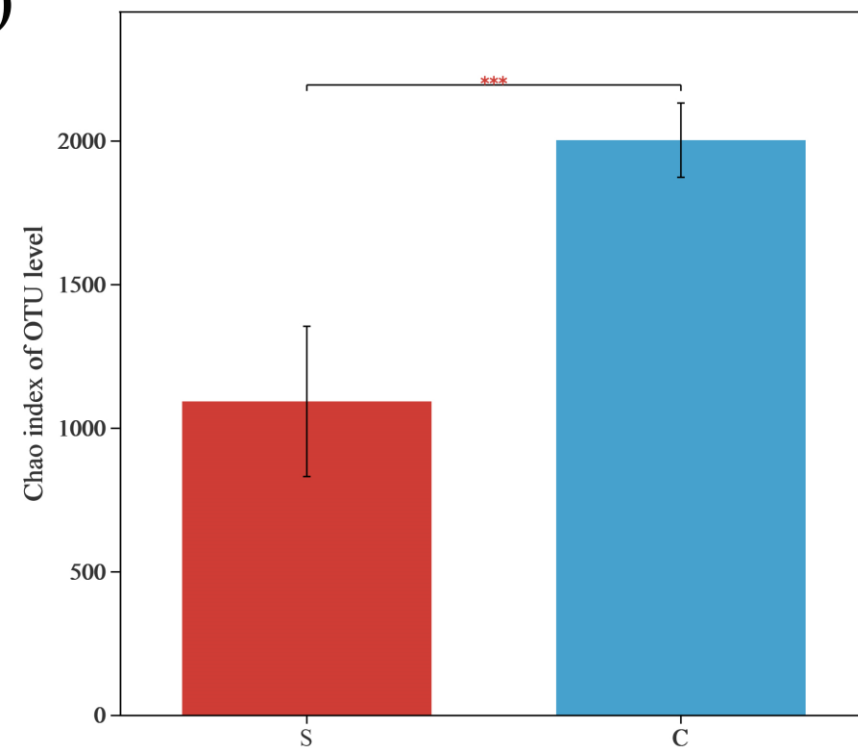

(C)

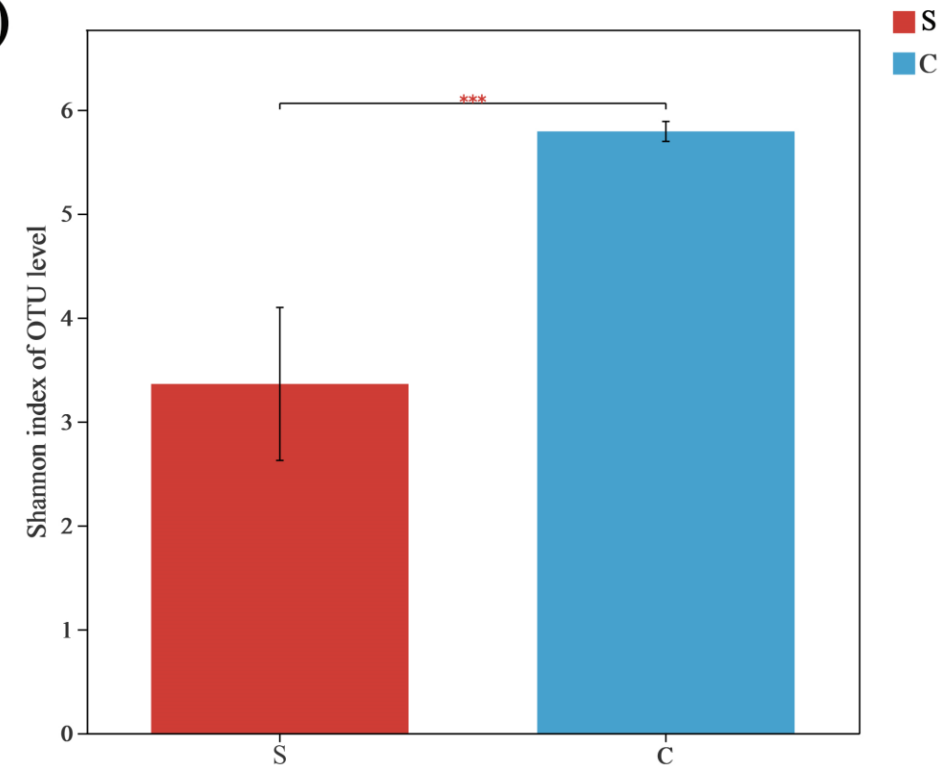

Supplement: Fig_S2.pdf [file Fig_S2.pdf]
