# Supplementary material for: How do living conditions affect the gut microbiota of endangered Père David’s deer (Elaphurus davidianus)? Initial findings from the warm temperate zone
Source: PeerJ journal article supplement (doi:10.7717/peerj.14897), 2023-02-24

# COG function classification

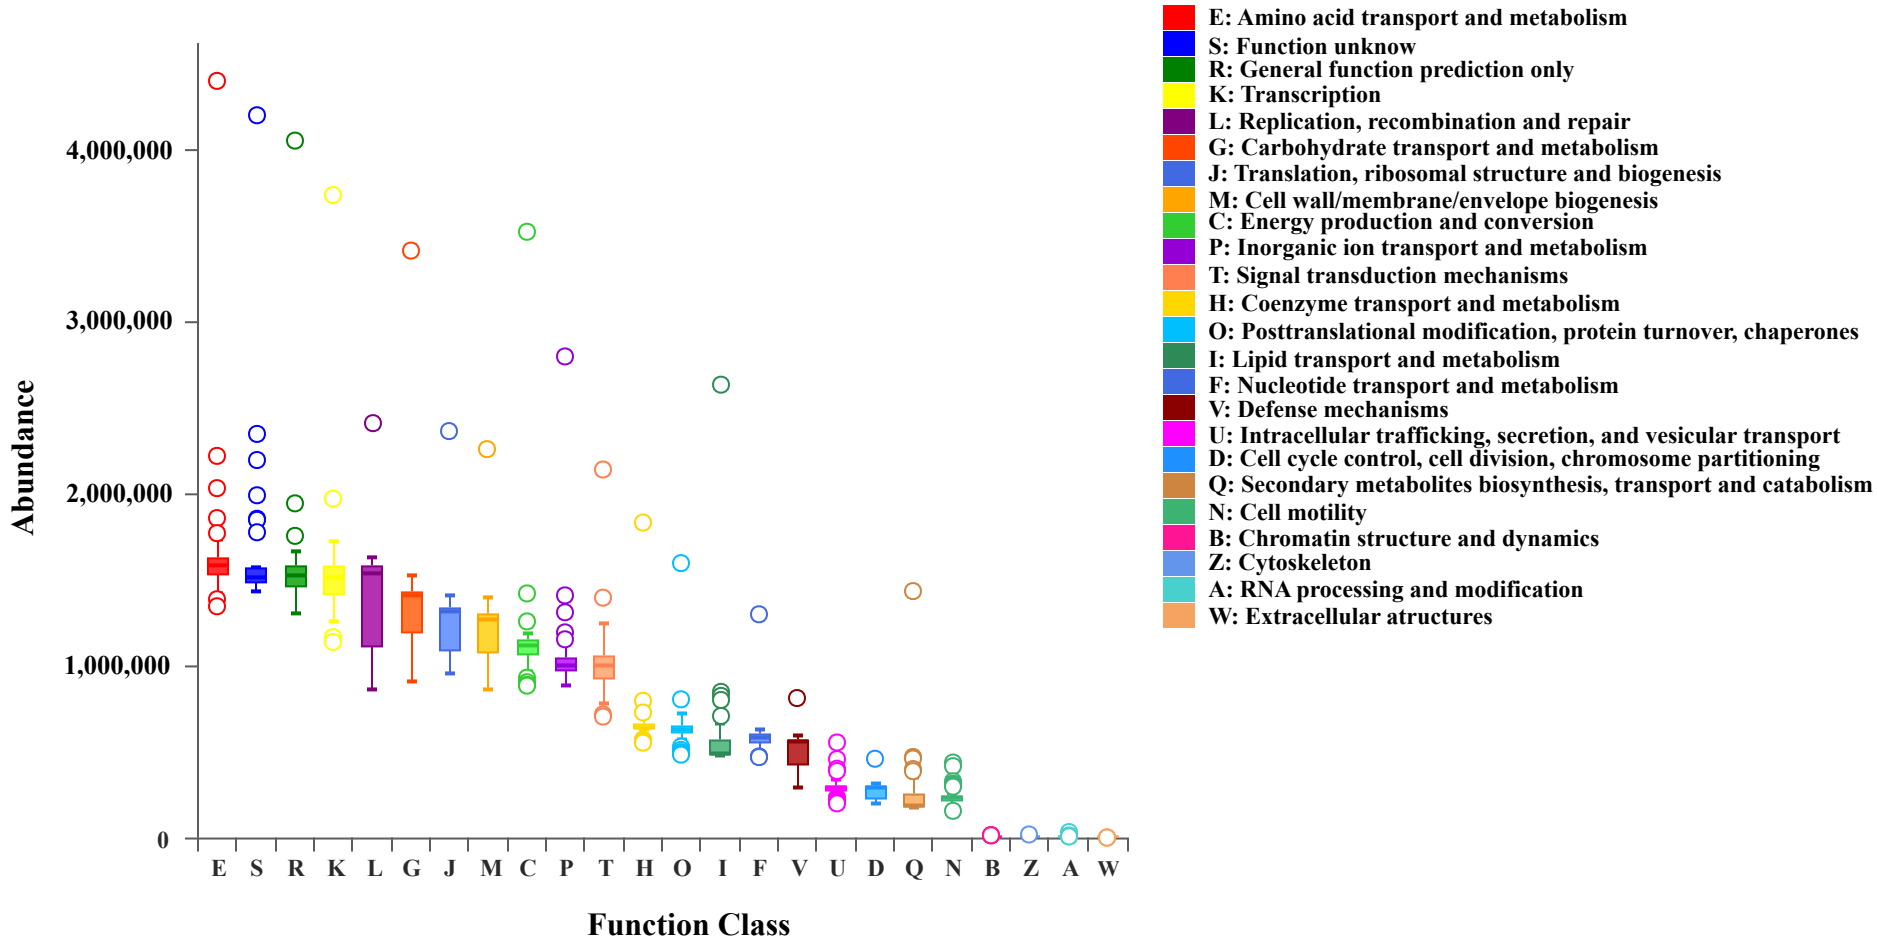

Supplement: Fig_S4.pdf [file Fig_S4.pdf]
